# Supplementary material for: Low dose of Bisphenol A enhance the susceptibility of thyroid carcinoma stimulated by DHPN and iodine excess in F344 rats
Source: PubMed Central journal article supplement (PMC5642523; doi:10.18632/oncotarget.19434), 2017-07-22
Supplement: oncotarget-08-69874-s001.pdf [file oncotarget-08-69874-s001.pdf]

# Low dose of Bisphenol A enhance the susceptibility of thyroid carcinoma stimulated by DHPN and iodine excess in F344 rats

## SUPPLEMENTARY MATERIALS

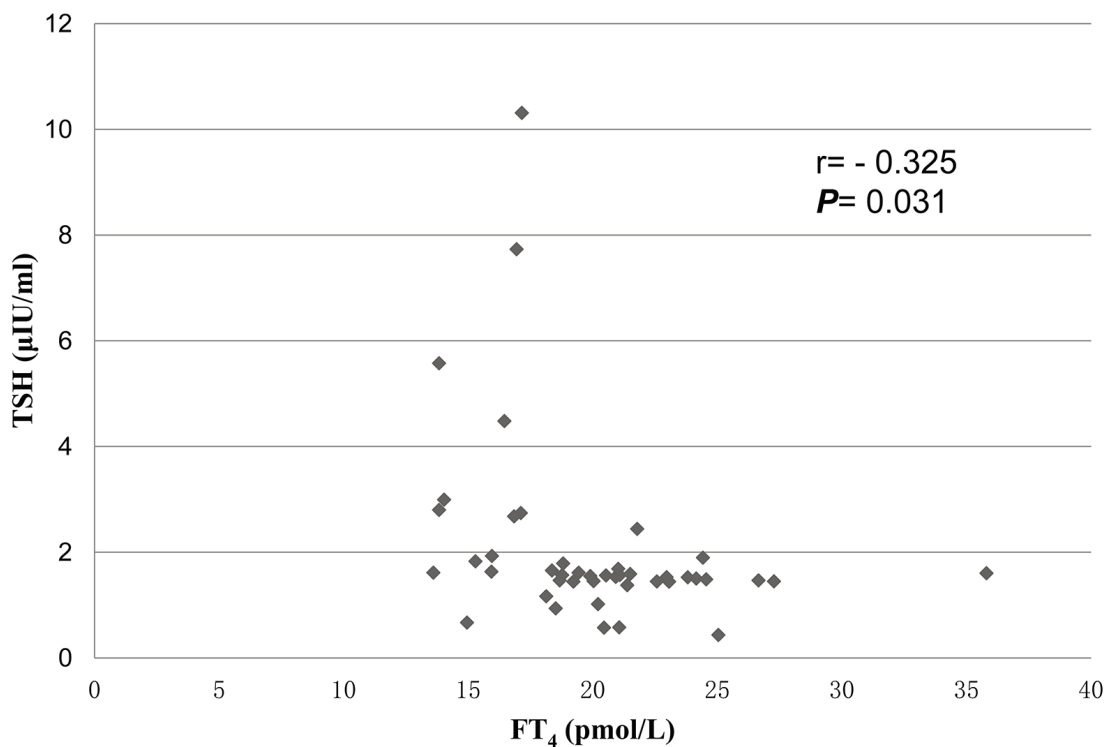

Supplementary Figure 1: The Pearson correlation between serum FT<sub>4</sub> and TSH concentration of F344 rats. ( $r$  = Pearson correlation coefficient).

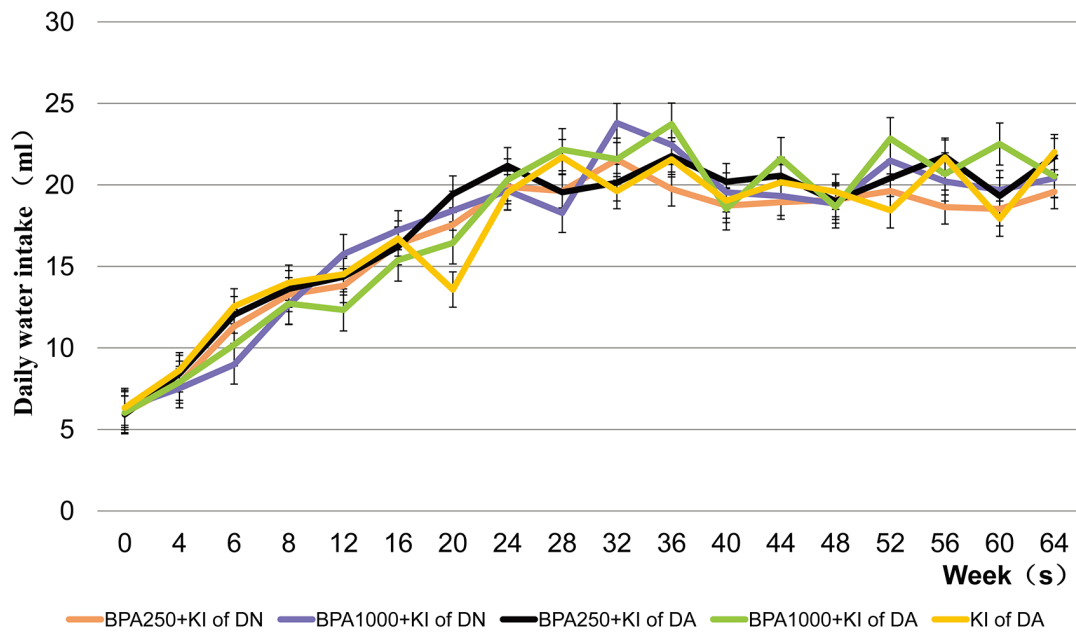

Supplementary Figure 2: The average daily water intake of F344 rats.
